# Supplementary material
Source: publisher site journal article supplement (https://www.dovepress.com/get_supplementary_file.php?f=supplementary_file_2_51969.pdf)
Supplement: Supplementary file 1 [file get_supplementary_file.php]

**Table S2. Identification of 45 up-regulated miRNAs and 37 down-regulated miRNAs compared with the control**

|    | p-value   | Mean of intensities in Normal cells | Mean of intensities in Tumor cells | Fold-change | UniqueID       |
|----|-----------|-------------------------------------|------------------------------------|-------------|----------------|
| 1  | 1.00E-07  | 989.43                              | 111.6                              | 0.11        | hsa-miR-770-5p |
| 2  | 1.00E-07  | 21486.24                            | 314.13                             | 0.01        | hsa-miR-370    |
| 3  | 4.00E-07  | 10790.68                            | 173.57                             | 0.02        | hsa-miR-369-3p |
| 4  | 4.00E-07  | 5332.8                              | 92.76                              | 0.02        | hsa-miR-656    |
| 5  | 2.40E-06  | 7734.84                             | 108.02                             | 0.01        | hsa-miR-655    |
| 6  | 3.70E-06  | 10614.88                            | 168.83                             | 0.02        | hsa-miR-299-5p |
| 7  | 4.00E-06  | 8011.34                             | 230.87                             | 0.03        | hsa-miR-431    |
| 8  | 1.16E-05  | 4968.77                             | 168.75                             | 0.03        | hsa-miR-487a   |
| 9  | 1.18E-05  | 1463.47                             | 124.78                             | 0.09        | hsa-miR-136    |
| 10 | 1.45E-05  | 832.5                               | 304.65                             | 0.37        | hsa-miR-299-3p |
| 11 | 1.67E-05  | 16612.22                            | 213.08                             | 0.01        | hsa-miR-432    |
| 12 | 2.13E-05  | 1001.23                             | 123.89                             | 0.12        | hsa-miR-496    |
| 13 | 3.67E-05  | 10543.58                            | 669.56                             | 0.06        | hsa-miR-539    |
| 14 | 4.03E-05  | 16098.82                            | 225.73                             | 0.01        | hsa-miR-379    |
| 15 | 4.40E-05  | 628.55                              | 12160.33                           | 19.35       | hsa-miR-96     |
| 16 | 6.17E-05  | 26268.8                             | 357.84                             | 0.01        | hsa-miR-494    |
| 17 | 7.35E-05  | 523.54                              | 114.82                             | 0.22        | HS_155         |
| 18 | 8.85E-05  | 920.47                              | 2957.52                            | 3.21        | HS_52          |
| 19 | 9.18E-05  | 1957.28                             | 118.76                             | 0.06        | hsa-miR-376a*  |
| 20 | 0.0001018 | 20627.08                            | 184.76                             | 0.01        | hsa-miR-411    |
| 21 | 0.000103  | 12041.6                             | 328.32                             | 0.03        | hsa-miR-376a   |
| 22 | 0.0001823 | 231.57                              | 336.88                             | 1.45        | HS_200         |
| 23 | 0.0001878 | 2935.87                             | 115.13                             | 0.04        | hsa-miR-409-5p |
| 24 | 0.0001902 | 860.62                              | 303.88                             | 0.35        | HS_250         |
| 25 | 0.0002087 | 1503.12                             | 21679.22                           | 14.42       | hsa-miR-378    |
| 26 | 0.0002531 | 477.94                              | 124.53                             | 0.26        | hsa-miR-432*   |
| 27 | 0.0003038 | 2322.1                              | 18128.39                           | 7.81        | hsa-miR-183    |
| 28 | 0.0003437 | 318.75                              | 1265.77                            | 3.97        | hsa-miR-643    |
| 29 | 0.0003633 | 7127.32                             | 197.4                              | 0.03        | hsa-miR-382    |
| 30 | 0.0004097 | 262.57                              | 406.21                             | 1.55        | hsa-miR-206    |
| 31 | 0.0004121 | 622.33                              | 1299.12                            | 2.09        | hsa-miR-449b   |
| 32 | 0.0004409 | 6261.05                             | 772.16                             | 0.12        | hsa-miR-452*   |
| 33 | 0.0004779 | 2456.53                             | 13551.28                           | 5.52        | hsa-miR-107    |
| 34 | 0.0004876 | 21403.33                            | 292.41                             | 0.01        | hsa-miR-409-3p |
| 35 | 0.0004927 | 3998.38                             | 19298.08                           | 4.83        | hsa-miR-182    |
| 36 | 0.0005116 | 20145.68                            | 313.25                             | 0.02        | hsa-miR-134    |
| 37 | 0.0005749 | 1675.38                             | 304.22                             | 0.18        | hsa-miR-485-5p |
| 38 | 0.0005951 | 734.19                              | 3638.35                            | 4.96        | hsa-miR-182*   |
| 39 | 0.0006203 | 4621.87                             | 327.72                             | 0.07        | hsa-miR-433    |
| 40 | 0.0006261 | 1623.13                             | 840.4                              | 0.52        | hsa-miR-585    |
| 41 | 0.0006611 | 1674.45                             | 4209.78                            | 2.51        | HS_244         |
| 42 | 0.0006626 | 14349.5                             | 399.72                             | 0.03        | hsa-miR-485-3p |
| 43 | 0.0006778 | 7356.73                             | 16420.7                            | 2.23        | hsa-miR-186    |
| 44 | 0.0007318 | 5266.93                             | 18598.42                           | 3.53        | hsa-miR-500    |
| 45 | 0.0007577 | 838.11                              | 1418.11                            | 1.69        | HS_152         |
| 46 | 0.0007739 | 6892.77                             | 850.15                             | 0.12        | hsa-miR-381    |
| 47 | 0.0007804 | 5224.86                             | 10903.4                            | 2.09        | hsa-miR-769-5p |
| 48 | 0.0008503 | 1290.12                             | 4125.06                            | 3.2         | HS_260         |
| 49 | 0.0009612 | 282.97                              | 153.08                             | 0.54        | HS_221         |
| 50 | 0.001359  | 124.99                              | 105.01                             | 0.84        | hsa-miR-448    |
| 51 | 0.0013755 | 154.1                               | 16272.55                           | 105.6       | hsa-miR-141    |
| 52 | 0.0014129 | 835.19                              | 1850.41                            | 2.22        | HS_71.1        |
| 53 | 0.001418  | 381.31                              | 26699.02                           | 70.02       | hsa-miR-106a   |
| 54 | 0.0014456 | 8118.32                             | 223.5                              | 0.03        | hsa-miR-154    |
| 55 | 0.0014894 | 10157.06                            | 304.02                             | 0.03        | hsa-miR-495    |
| 56 | 0.0015111 | 188.43                              | 142.47                             | 0.76        | HS_132.1       |
| 57 | 0.0015437 | 399.53                              | 680.55                             | 1.7         | hsa-miR-507    |
| 58 | 0.001698  | 648.41                              | 1054.54                            | 1.63        | HS_20          |
| 59 | 0.0017871 | 3898.56                             | 245.65                             | 0.06        | hsa-miR-154*   |
| 60 | 0.0019864 | 27284.46                            | 483.82                             | 0.02        | hsa-miR-329    |
| 61 | 0.0020012 | 359.49                              | 530.54                             | 1.48        | hsa-miR-614    |
| 62 | 0.0022724 | 3024.81                             | 7764.87                            | 2.57        | HS_96          |
| 63 | 0.0023762 | 2028                                | 6199.85                            | 3.06        | hsa-miR-769-3p |

|    |           |          |          |       |              |
|----|-----------|----------|----------|-------|--------------|
| 64 | 0.0026699 | 4580.46  | 631.15   | 0.14  | hsa-miR-376b |
| 65 | 0.0027157 | 116.26   | 147.03   | 1.26  | hsa-miR-558  |
| 66 | 0.0027915 | 518.29   | 752.25   | 1.45  | hsa-miR-564  |
| 67 | 0.00304   | 25009.47 | 364.43   | 0.01  | hsa-miR-487b |
| 68 | 0.0033235 | 766.99   | 1506.41  | 1.96  | HS_113       |
| 69 | 0.003433  | 1928.62  | 528.63   | 0.27  | hsa-miR-377  |
| 70 | 0.0034795 | 1664.68  | 35108.81 | 21.09 | hsa-miR-200c |
| 71 | 0.0035562 | 6338.6   | 183.03   | 0.03  | hsa-miR-410  |
| 72 | 0.0036973 | 230.01   | 128.26   | 0.56  | HS_58        |
| 73 | 0.003776  | 237.33   | 499.38   | 2.1   | HS_304_a     |
| 74 | 0.0041306 | 96.97    | 109.6    | 1.13  | HS_107       |
| 75 | 0.0042938 | 134.37   | 173.16   | 1.29  | HS_144       |
| 76 | 0.0044381 | 398.61   | 615.62   | 1.54  | HS_219       |
| 77 | 0.0046678 | 180.88   | 266.75   | 1.47  | HS_23        |
| 78 | 0.0063231 | 135.45   | 178.98   | 1.32  | HS_267       |
| 79 | 0.0063292 | 553.29   | 915.18   | 1.65  | HS_268       |
| 80 | 0.006384  | 233.73   | 1873.39  | 8.02  | hsa-miR-604  |
| 81 | 0.0068319 | 208.27   | 121.74   | 0.58  | HS_72        |
| 82 | 0.008663  | 151.14   | 115.45   | 0.76  | HS_111       |
